# Supplementary material for: Realistic camera noise modeling with application to improved HDR synthesis
Source: Springer Nature journal article supplement (doi:10.1186/1687-6180-2012-171), 2012-08-16
Supplement: 13634_2011_389_MOESM1_ESM.pdf [file 13634_2011_389_MOESM1_ESM.pdf]

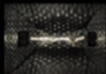

(a) LDR with  $\Delta t_1 = 1/40000\text{s}$ .

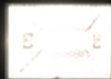

(b) LDR with  $\Delta t_2 = 1/25\text{s}$ .

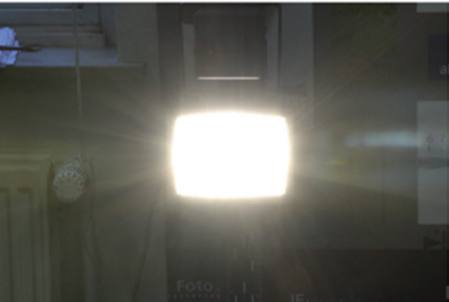

(c) LDR with  $\Delta t_3 = 1\text{s}$ .

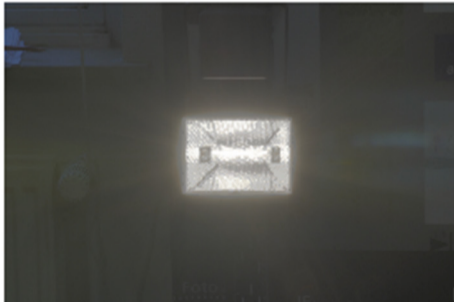

(d) HDR reconstruction.
