# Supplementary material for: Realistic camera noise modeling with application to improved HDR synthesis
Source: Springer Nature journal article supplement (doi:10.1186/1687-6180-2012-171), 2012-08-16
Supplement: 13634_2011_389_MOESM12_ESM.pdf [file 13634_2011_389_MOESM12_ESM.pdf]

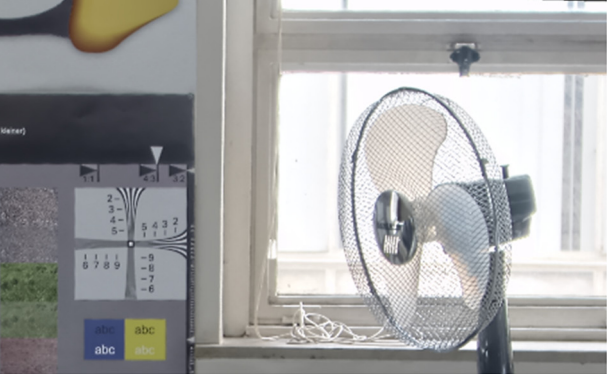

(a) HDR from densely sampled LDR images

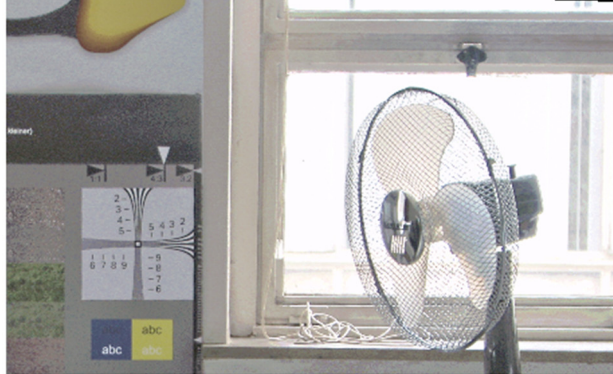

(b) Debevec (Est. SNR=22.28dB)

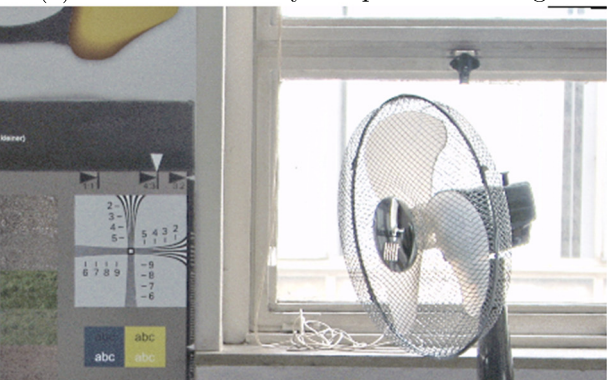

(c) De Neve (Est. SNR=22.74dB)

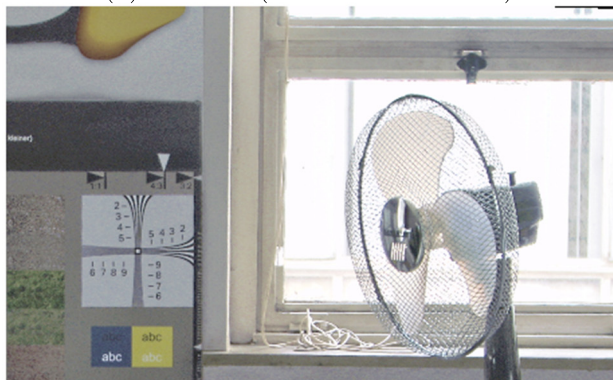

(d) Proposed (Est. SNR=22.59dB)
