# Supplementary material for: Realistic camera noise modeling with application to improved HDR synthesis
Source: Springer Nature journal article supplement (doi:10.1186/1687-6180-2012-171), 2012-08-16

Identity CRF  $\gamma(y) = y$

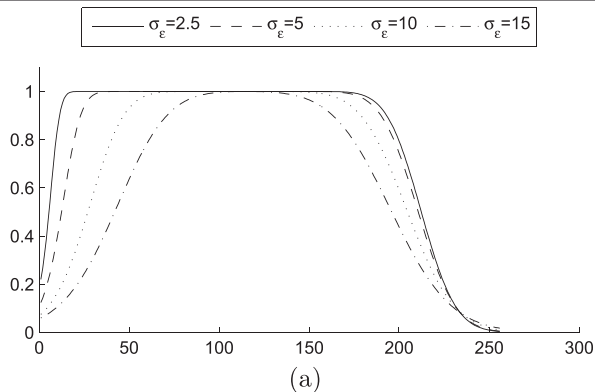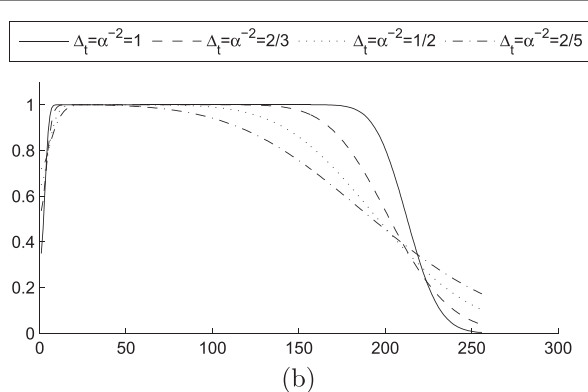

Gamma correction CRF  $\gamma(y) = 255 (y/255)^{0.4}$

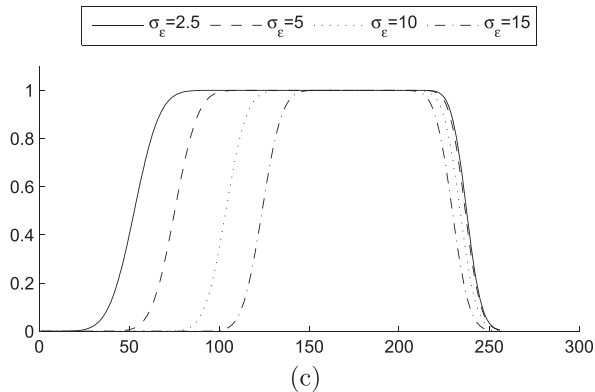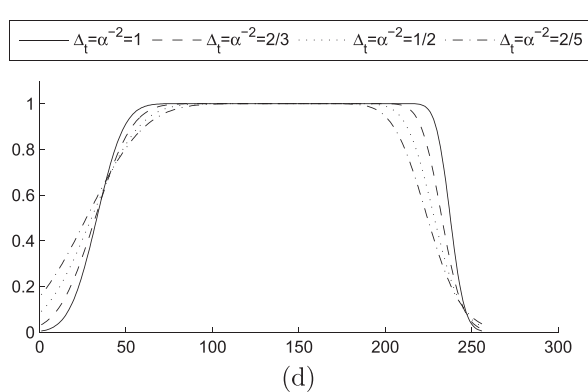

Supplement: 13634_2011_389_MOESM13_ESM.pdf [file 13634_2011_389_MOESM13_ESM.pdf]
