# Supplementary material for: Realistic camera noise modeling with application to improved HDR synthesis
Source: Springer Nature journal article supplement (doi:10.1186/1687-6180-2012-171), 2012-08-16
Supplement: 13634_2011_389_MOESM14_ESM.pdf [file 13634_2011_389_MOESM14_ESM.pdf]

— Equation (28)    ····· Probabilistic rule (32)    - - - - - Approximated closed-form formula (33)

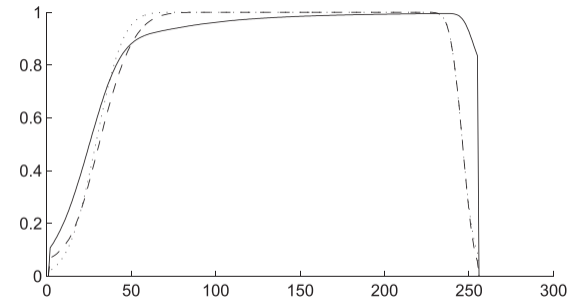

(a)  $\sigma_{o,j}^2 = 1$

— Equation (28)    ····· Probabilistic rule (32)    - - - - - Approximated closed-form formula (33)

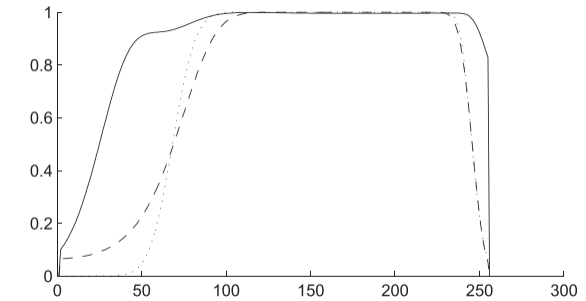

(b)  $\sigma_{o,j}^2 = 625$
