# Supplementary material for: Realistic camera noise modeling with application to improved HDR synthesis
Source: Springer Nature journal article supplement (doi:10.1186/1687-6180-2012-171), 2012-08-16
Supplement: 13634_2011_389_MOESM18_ESM.pdf [file 13634_2011_389_MOESM18_ESM.pdf]

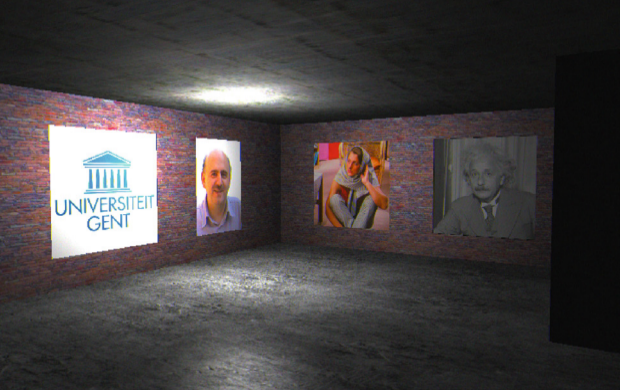

(a) Compressed HDR image

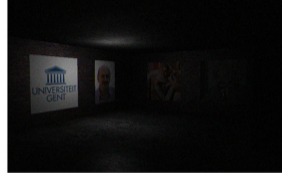

(b) LDR  $\Delta t = 1 / 100s.$

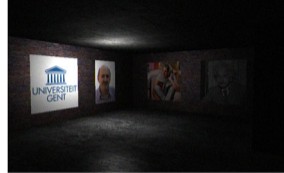

(c) LDR  $\Delta t = 1 / 4s.$

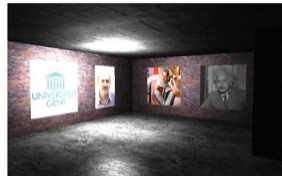

(d) LDR  $\Delta t = 1 s.$

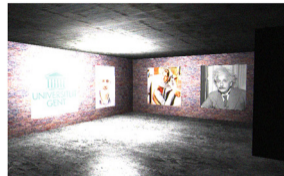

(e) LDR  $\Delta t = 2 s.$
