# Supplementary material for: Realistic camera noise modeling with application to improved HDR synthesis
Source: Springer Nature journal article supplement (doi:10.1186/1687-6180-2012-171), 2012-08-16
Supplement: 13634_2011_389_MOESM20_ESM.pdf [file 13634_2011_389_MOESM20_ESM.pdf]

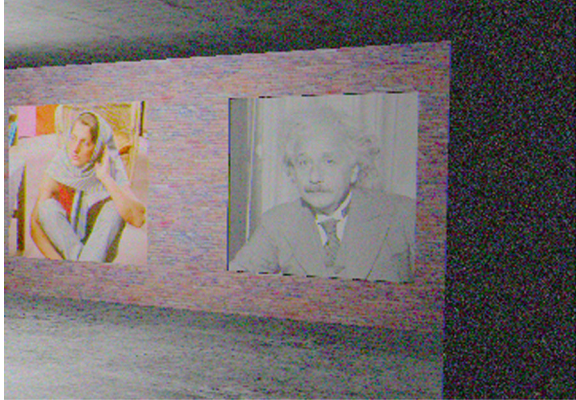

(a) Weighting function of Debevec et al.: PSNR = 25.70dB.

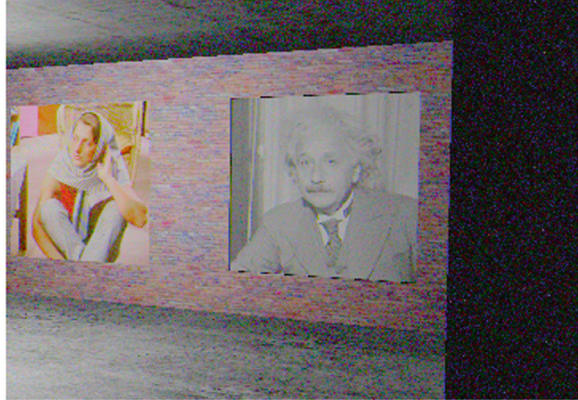

(b) Prob. weighting function PSNR = 28.59dB.
