# Supplementary material for: Realistic camera noise modeling with application to improved HDR synthesis
Source: Springer Nature journal article supplement (doi:10.1186/1687-6180-2012-171), 2012-08-16
Supplement: 13634_2011_389_MOESM23_ESM.pdf [file 13634_2011_389_MOESM23_ESM.pdf]

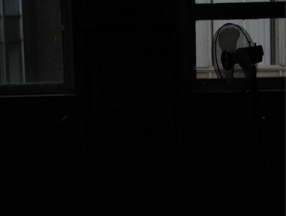

(a)  $\Delta t_1 = 1/100s$

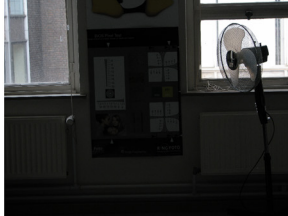

(b)  $\Delta t_2 = 1/10s$

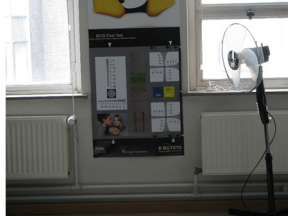

(c)  $\Delta t_3 = 1/2s$

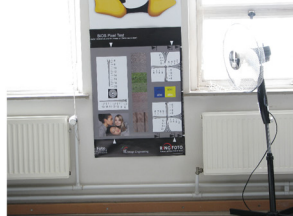

(d)  $\Delta t_4 = 2s$
